# Supplementary material for: Feasibility of Using Short Message Service and In-Depth Interviews to Collect Data on Contraceptive Use Among Young, Unmarried, Sexually Active Men in Moshi, Tanzania, and Addis Ababa, Ethiopia: Mixed Methods Study With a Longitudinal Follow-Up
Source: PubMed Central journal article supplement (PMC6617913; doi:10.2196/12657), 2019-06-26
Supplement: formative_v3i2e12657_app1.pdf [file formative_v3i2e12657_app1.pdf]

Table 2: Feedback on SMS system from Tanzanian participants

|                                                   |                     |
|---------------------------------------------------|---------------------|
| <b>Participants feedback from exit interviews</b> | <b>N 25(71.40%)</b> |
| <b>General experience with receiving SMS</b>      |                     |
| Not good at all                                   | 0 (0.0)             |
| Not good                                          | 1 (4.0)             |
| Good                                              | 19 (76.0)           |
| Very good                                         | 5 (20.0)            |
|                                                   |                     |
| <b>Did SMS come on time?</b>                      |                     |
| Yes                                               | 21 (84.0)           |
| No                                                | 3 (12.0)            |
|                                                   |                     |
| <b>SMS don't come on time (n=1)</b>               |                     |
| SMS came later as the phone was switched off      |                     |
| SMS delivered late due to network problems        |                     |
|                                                   |                     |
| <b>Difficulties with receiving SMS</b>            |                     |
| Yes                                               | 3 (12.0)            |
| No                                                | 22 (88.0)           |
|                                                   |                     |
| <b>Difficulties</b>                               |                     |
| Some days there were no SMS received              |                     |
| Delay in receiving SMS                            |                     |
| No airtime to reply to SMS                        |                     |
|                                                   |                     |
| <b>Comments about content of SMS</b>              |                     |

|                                                                                                                                             |           |
|---------------------------------------------------------------------------------------------------------------------------------------------|-----------|
| Not good at all                                                                                                                             | 0 (0.0)   |
| Not good                                                                                                                                    | 0 (0.0)   |
| Good                                                                                                                                        | 21 (84.0) |
| Very good                                                                                                                                   | 4 (16.0)  |
|                                                                                                                                             |           |
| <b>Any problem during receiving SMS</b>                                                                                                     |           |
| Yes                                                                                                                                         | 2 (8.0)   |
| No                                                                                                                                          | 23 (92.0) |
| <b>Problems:</b>                                                                                                                            |           |
| Issues about contraceptives were not clear                                                                                                  |           |
| <b>Is it accepted/appropriate to receive SMS?</b>                                                                                           |           |
| Yes                                                                                                                                         | 21 (84)   |
| No                                                                                                                                          | 4 (16.0)  |
|                                                                                                                                             |           |
|                                                                                                                                             |           |
| <b>Were you able to respond to the SMS sent to you?</b>                                                                                     |           |
| Yes                                                                                                                                         | 18 (72.0) |
| No                                                                                                                                          | 7 (28.0)  |
|                                                                                                                                             |           |
| <b>Expectation on future studies on using SMS</b>                                                                                           |           |
| There should be a sophisticated system that shows immediate reports on replies and questions asked even if network is low or unavailable    |           |
| The SMS should also focus on relationships among young men                                                                                  |           |
| There should be more questions on interesting topics                                                                                        |           |
| Time of sending SMS should be taken into consideration, for example it should be done after working/class hours such as late in the evening |           |
